# Supplementary material
Source: publisher figshare collection journal article supplement (https://future-science-group.figshare.com/ndownloader/files/31796276)
Supplement: Supplementary file 1 [file 31796276]

**Supplementary Table 1.** Call rate for genotyped SNPs and the number of available cases in the analyses of associations of genotype with baseline lipid levels and baseline carotid intima-media thickness.

| Gene,  SNP | Number of patients genotyped | Call rate, % | Number of patients with available data | | | | |
| --- | --- | --- | --- | --- | --- | --- | --- |
| TC | LDL-C | HDL-C | TG | CIMT |
| *LPA* rs10455872 | 792 | 100 | 792 | 515 | 522 | 629 | 397 |
| *LDLR* rs11672123 | 791 | 99.9 | 791 | 514 | 522 | 628 | 396 |
| *LDLR* rs6511720 | 790 | 99.7 | 790 | 514 | 521 | 628 | 396 |
| *APOC1* rs445925 | 663 | 83.7 | 663 | 402 | 409 | 516 | 308 |
| *APOE* rs7412 | 479 | 60.5 | 479 | 334 | 339 | 401 | 233 |
| *MYLIP* rs6924995 | 790 | 99.7 | 790 | 513 | 520 | 627 | 395 |
| *MYLIP* rs3757354 | 791 | 99.9 | 791 | 514 | 521 | 628 | 396 |
| *ABCG2* rs2199936 | 782 | 98.7 | 782 | 505 | 512 | 619 | 387 |
| *ABCG2* rs1481012 | 790 | 99.7 | 790 | 513 | 520 | 627 | 395 |
| SNP indicates single nucleotide polymorphism; TC, total cholesterol; LDL-C, low-density lipoprotein cholesterol; HDL-C, high-density lipoprotein cholesterol; TG, triglycerides; CIMT, carotid intima-media thickness | | | | | | | |
